# Supplementary material
Source: PubMed Central journal article supplement (PMC7179313)
Supplement: AAC.02438-19-s0001.pdf [file AAC.02438-19-s0001.pdf]

**Supplemental Table 1.** *In vitro* activity of rezafungin against isolates of uncommon *Candida* species and other yeast as determined by EUCAST E.Def 7.3.1.

| Species                               | n         | MIC (mg/L) |          |           |          |          |          |           |          |          |           | Range (mg/L)   |
|---------------------------------------|-----------|------------|----------|-----------|----------|----------|----------|-----------|----------|----------|-----------|----------------|
|                                       |           | 0.016      | 0.03     | 0.06      | 0.125    | 0.25     | 0.5      | 1         | 2        | 4        | ≥8        |                |
| Other <i>Candida</i> w MIC ≤0.25 mg/L |           |            |          |           |          |          |          |           |          |          |           |                |
| <i>C. kefyr</i>                       | 14        |            |          | 9         | 5        |          |          |           |          |          |           | 0.06-0.125     |
| <i>C. inconspicua</i>                 | 3         |            |          | 3         |          |          |          |           |          |          |           | 0.06           |
| <i>C. nivariensis</i>                 | 2         |            |          | 1         | 1        |          |          |           |          |          |           | 0.06-0.125     |
| <i>C. norvegensis</i>                 | 1         |            |          |           | 1        |          |          |           |          |          |           | 0.125          |
| <i>C. pelliculosa</i>                 | 1         |            |          | 1         |          |          |          |           |          |          |           | 0.06           |
| <i>C. utilis</i>                      | 3         |            | 2        | 1         |          |          |          |           |          |          |           | 0.03-0.06      |
| Other <i>Candida</i> w MIC ≥0.5 mg/L  |           |            |          |           |          |          |          |           |          |          |           |                |
| <i>C. guilliermondii</i>              | 13        |            |          |           |          | 1        | 4        | 4         | 4        |          |           | 0.25-2         |
| <i>C. metapsilosis</i>                | 5         |            |          |           |          |          | 1        | 2         |          |          |           | 0.5-1          |
| <i>C. orthopsilosis</i>               | 5         |            |          |           |          |          | 2        | 2         | 1        |          |           | 0.5-2          |
| <i>C. fermentati</i>                  | 3         |            |          |           |          |          |          | 2         | 1        |          |           | 1-2            |
| <i>C. doubushaemulonis</i>            | 1         |            |          |           |          |          | 1        |           |          |          |           | 0.5            |
| <i>Candida</i> species (new)          | 4         |            |          | 1         |          |          | 1        | 1         |          |          | 1         | 0.06-8         |
| Other yeast                           |           |            |          |           |          |          |          |           |          |          |           |                |
| <i>Cryptococcus neoformans</i>        | 8         |            |          |           |          |          |          |           |          |          | 8         | ≥8             |
| <i>Magnusiomyces capitatus</i>        | 3         |            |          |           |          |          |          |           |          | 1        | 2         | 4-≥8           |
| <i>Pichia kluyveri</i>                | 2         |            | 1        | 1         |          |          |          |           |          |          |           | 0.03-0.06      |
| <i>Geotrichum capitatum</i>           | 1         |            |          |           |          |          |          |           |          | 1        |           | 4              |
| <i>Geotrichum silvicola</i>           | 1         |            |          |           |          |          |          |           |          |          | 1         | ≥8             |
| <i>Lecythophora hoffmanii</i>         | 1         |            |          |           |          |          |          |           |          |          | 1         | ≥8             |
| <i>Lodderomyces elongisporus</i>      | 1         |            |          |           | 1        |          |          |           |          |          |           | 0.125          |
| <i>Pichia salicaria</i>               | 1         |            |          |           |          |          |          | 1         |          |          |           | 1              |
| <i>Rhodotorula mucilaginosa</i>       | 1         |            |          |           |          |          |          |           |          |          | 1         | ≥8             |
| <i>Saccharomyces telluris</i>         | 1         |            |          | 1         |          |          |          |           |          |          |           | 0.06           |
| <i>Saturnispora</i> species           | 1         |            | 1        |           |          |          |          |           |          |          |           | 0.03           |
| <i>Trichosporon mucoides</i>          | 1         |            |          |           |          |          |          |           |          |          | 1         | ≥8             |
| <b>Total</b>                          | <b>77</b> |            | <b>4</b> | <b>18</b> | <b>8</b> | <b>1</b> | <b>9</b> | <b>12</b> | <b>6</b> | <b>2</b> | <b>15</b> | <b>0.03-≥8</b> |
